# Supplementary material
Source: PubMed Central journal article supplement (PMC2659247)

Fig. S1. Analysis of focal adhesion area following H/0 or ultrasound stimulation. (A) Wild-type or (B) syndecan-4 <sup>-/-</sup> MEFs, or (C) primary human fibroblasts were spread on 50K for 2 hours before stimulating with syndecan-4 ligand (H/0) or ultrasound. Fixed cells were stained for vinculin and photographed. Following rolling-ball background subtraction, pixel intensity thresholds were applied to the images to allow focal adhesion area to be measured digitally, using ImageJ software. Resultant masks for each condition are depicted. (D) Total focal adhesion area of 25-35 cells per condition was measured using image J software.

**A**

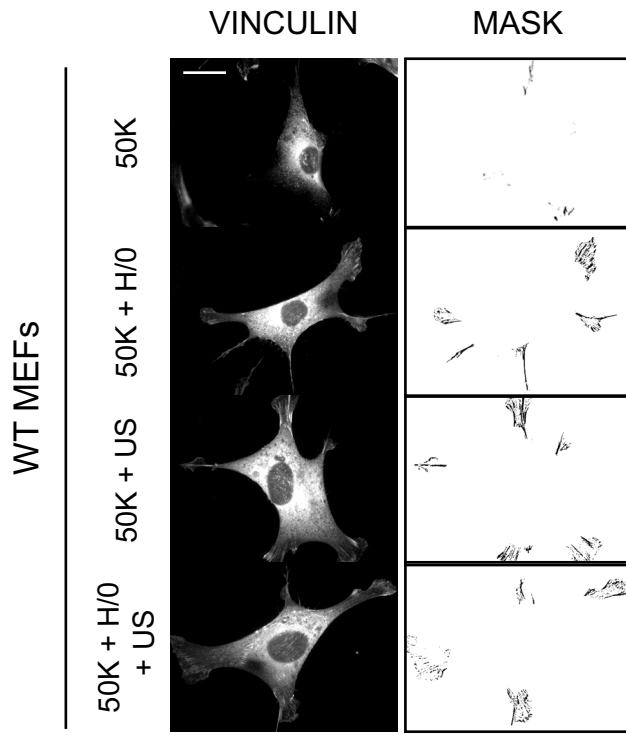

**B**

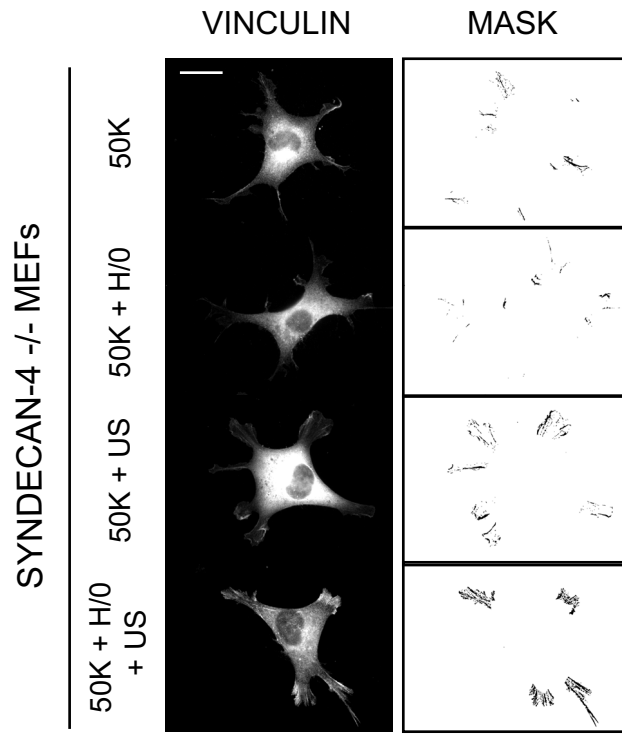

**C**

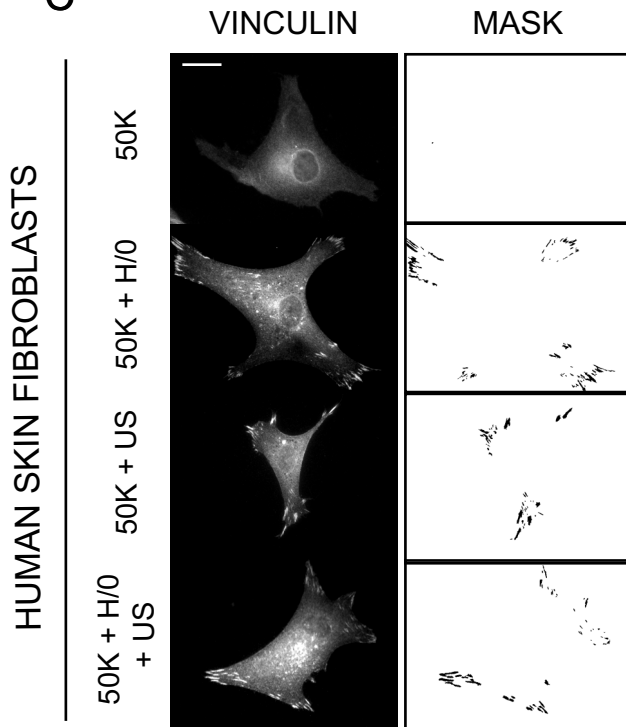

**D**

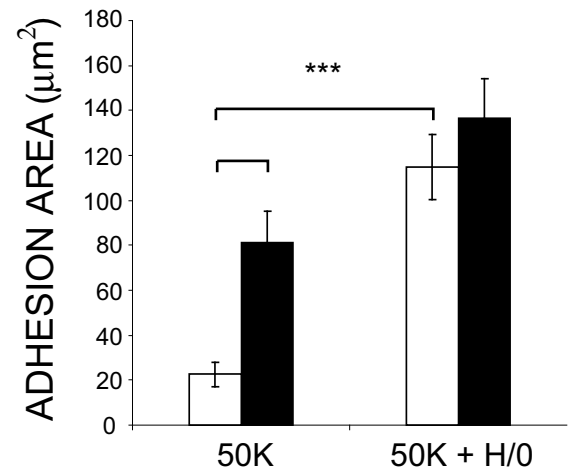

Supplement: M804281200_1.pdf [file M804281200_1.pdf]
